# Supplementary material for: The Plight of Chicano Students: An Overview of Schooling Conditions and Outcomes. Chapter 1.
Source: Royal Society of Chemistry journal article supplement (doi:10.1039/d2sm00359g), 1993-01-01
Supplement: d2sm00359g1.pdf [file d2sm00359g1.pdf]

## Supplement to Drying dynamics of pellet feces

Benjamin Magondu<sup>3+</sup>, Alexander B. Lee<sup>2+</sup>, Andrew Schulz<sup>1</sup>,  
Gabriel Cervantes Buchelli<sup>1</sup>, Michelle Meng<sup>1</sup>, Candice Kaminski<sup>2</sup>,  
Patricia J. Yang<sup>4</sup>, Scott Carver<sup>5</sup>, and David L. Hu<sup>1,2\*</sup>

Schools of Mechanical Engineering<sup>1</sup> and Biological Sciences<sup>2</sup>, Wallace H. Coulter Department of Biomedical Engineering<sup>3</sup>  
Georgia Institute of Technology, Atlanta, GA 30332, USA

Department of Power Mechanical Engineering<sup>4</sup>, National Tsing Hua University, Hsinchu, Taiwan

Department of Biological Science<sup>5</sup>, University of Tasmania, Hobart, Tasmania 7005, Australia

December 3, 2022

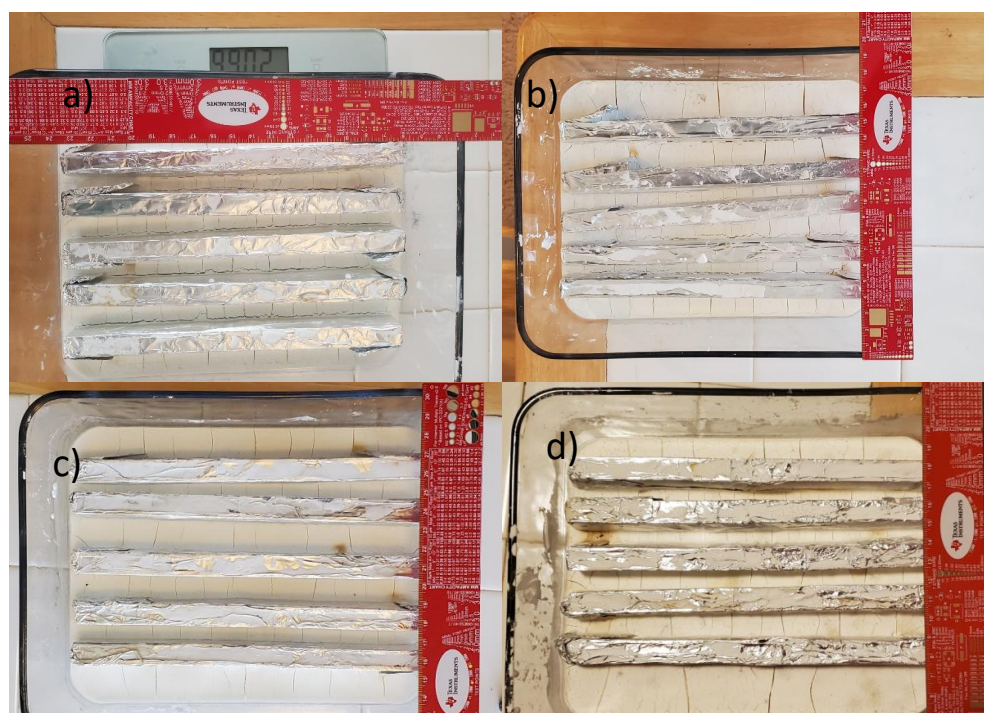

**Figure 1:** Corn starch cakes formed in wooden troughs. (a) Experiment conducted with lamp at 13 cm from dish. (b) Experiment conducted with lamp at 40 cm from dish. (c) Experiment conducted with lamp at 20 cm from dish (d) Experiment conducted without lamp.

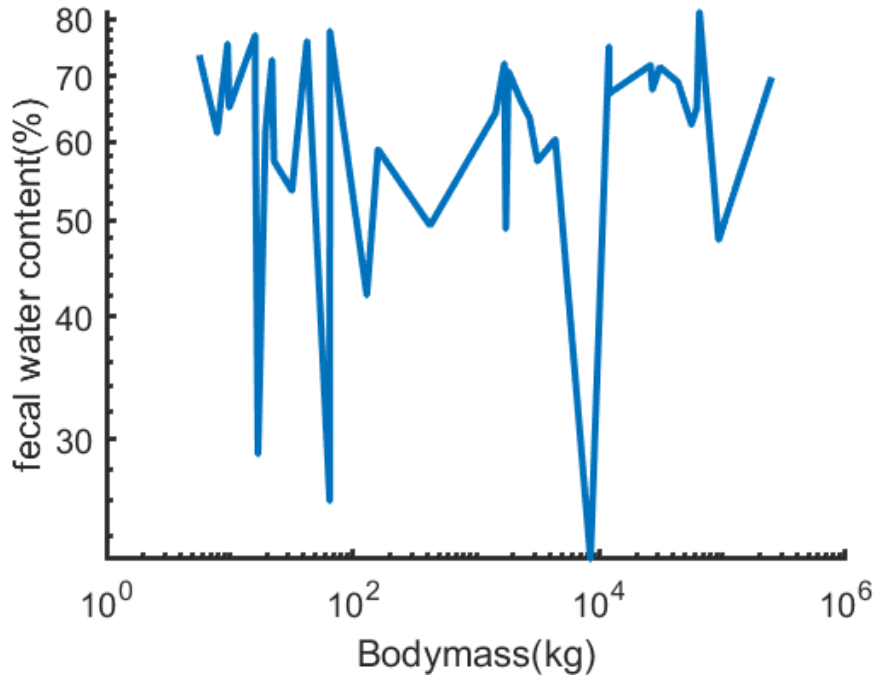

**Figure 2:** Relation between fecal water content and body mass for various mammals.

**Table 1:** Collection of animal body mass and fecal diameter values

| Animal                               | Scientific Name                | Body Mass(kg) | Diameter(cm) |
|--------------------------------------|--------------------------------|---------------|--------------|
| dairy cow <sup>1,2</sup>             | <i>Bos taurus</i>              | 600           | 1.13         |
| free range tapir <sup>1,3</sup>      | <i>Tapirus terrestris</i>      | 250           | 1.5          |
| captive tapir <sup>1</sup>           | <i>Tapir kabomani</i>          | 250           | 3            |
| free range przewalski <sup>1,4</sup> | <i>Equus ferus przewalskii</i> | 300           | 0.75         |
| captive przewalski <sup>1,4</sup>    | <i>Equus ferus przewalskii</i> | 300           | 0.5          |
| free range giraffe <sup>1</sup>      | <i>Giraffa camelopardalis</i>  | 980           | 0.38         |
| captive giraffe <sup>1</sup>         | <i>Giraffa camelopardalis</i>  | 980           | 0.75         |

4

5

**Table 2:** Collection of animal body mass and fecal water content 1:Rats were fed milk, 2: refers to: Miniature Poodles, Jack Terrier Russell, Miniature Schnauzer, 3: refers to: Standard Schnauzer, 4: refers to: Giant Schnauzers, 5: refers to: German Shepards, 6: refers to: Irish Cross breeds, Dutch Warmbloods and Highlands values

| Animal                                           | Scientific Name                     | Body Mass(kg)  | Fecal Water Content    |
|--------------------------------------------------|-------------------------------------|----------------|------------------------|
| Mongolian Gerbil <sup>5</sup>                    | <i>Meriones unguiculatus</i>        | 0.055-0.075 kg | 26 ±3                  |
| Arabian Oryx <sup>6</sup>                        | <i>Oryx leucoryx</i>                | 92.5 - 93.6 kg | 47.8 ±2.3              |
| Lab Mice <sup>7</sup>                            | <i>Mus musculus</i>                 | 0.0321 kg      | 53.6 ±1.1              |
| Northern yellow bat <sup>8</sup>                 | <i>Lasiurus intermedius</i>         |                | 57.4                   |
| Ghost faced bat <sup>8</sup>                     | <i>Mormoops megalophylla</i>        |                | 77                     |
| Hairy fruit-eating bat <sup>8</sup>              | <i>Artibeus hirsutus</i>            |                | 70.1 ±4                |
| Pallas's long-tongued bat <sup>8</sup>           | <i>Glossophaga soricina</i>         |                | 45.2 ±5.6 – 84.9 ± 4.3 |
| Mexican funnel-eared bat <sup>8</sup>            | <i>Natalus stramineus</i>           |                | 73.5 ±2.6              |
| Davy's naked-backed bat <sup>8</sup>             | <i>Pteronotus davyi</i>             |                | 75.5                   |
| Parnell's mustached bat <sup>8</sup>             | <i>Pteronotus parnellii</i>         |                | 51.6 ±2.3 – 71.1 ± 0.7 |
| Wagner's mustached bat <sup>8</sup>              | <i>Pteronotus personatus</i>        |                | 61.3 ±10.2             |
| Great fruit-eating bat <sup>8</sup>              | <i>Artibeus lituratus</i>           |                | 75.9 ±8.2 – 79.6 ± 1.7 |
| Jamaican fruit bat <sup>8</sup>                  | <i>Artibeus jamaicensis</i>         |                | 72.3 ±6.2 – 79 ± 2.5   |
| Little yellow-shouldered bat <sup>8</sup>        | <i>Sturnira lilium</i>              |                | 64.1 ±8.1              |
| Tent-making bat <sup>9</sup>                     | <i>Uroderma bilobatum</i>           |                | 66.6                   |
| Lesser long-nosed bat <sup>8</sup>               | <i>Leptonycteris yerbabuena</i>     |                | 72.7                   |
| Holstein bull calves <sup>10</sup>               | <i>Bos taurus</i>                   | 43.6 ±2kg      | 69                     |
| European Rabbits <sup>11</sup>                   | <i>Oryctolagus cuniculus</i>        |                | 49 ±6                  |
| Common Wallaroo <sup>12</sup>                    | <i>Macropus robustus erubescens</i> | 18.3 kg        | 70.8                   |
| Eastern Wallaroo <sup>12</sup>                   | <i>Macropus. r. robustus</i>        | 17 kg          | 72.1                   |
| Goat <sup>12</sup>                               | <i>Capra hircus</i>                 | 31.5 kg        | 57.4                   |
| Wistar Rats <sup>13</sup> <sub>1</sub>           | <i>Rattus norvegicus</i>            | 84.88 g        | 22.71 ±10.86           |
| Balb/c mice <sup>14</sup>                        | <i>mus musculus</i>                 | 17.02 ± 0.57g  | 28.99 ±6.84            |
| Hound dog <sup>15</sup>                          | <i>Canis lupus familiaris</i>       | 24 kg          | 75                     |
| Beagles <sup>15</sup>                            | <i>Canis lupus familiaris</i>       |                | 67.2 ±1.2              |
| German Shorthair <sup>15</sup>                   | <i>Canis lupus familiaris</i>       |                | 71.8 ±2.4              |
| German Shepherd <sup>16</sup>                    | <i>Canis lupus familiaris</i>       |                | 71.5±1.8               |
| "Small Dogs" <sup>16</sup> <sub>2</sub>          | <i>Canis lupus familiaris</i>       | 4.4 ± 0.5kg    | 60.4 ±2.0              |
| "Medium Dogs" <sup>16</sup> <sub>3</sub>         | <i>Canis lupus familiaris</i>       | 14.4 ±0.3kg    | 64.2 ±0.4              |
| "Large Tolerant Dogs" <sup>16</sup> <sub>4</sub> | <i>Canis lupus familiaris</i>       | 27.2 ±1.0kg    | 63.5 ±0.9              |

**Table 2:** Collection of animal body mass and fecal water content 1:Rats were fed milk, 2: refers to: Miniature Poodles, Jack Terrier Russell, Miniature Schnauzer, 3: refers to: Standard Schnauzer, 4: refers to: Giant Schnauzers, 5: refers to: German Shepherds, 6: refers to: Irish Cross breeds, Dutch Warmbloods and Highlands values

| <b>Animal</b>                                     | <b>Scientific Name</b>          | <b>Body Mass(kg)</b>       | <b>Fecal Water Content</b> |
|---------------------------------------------------|---------------------------------|----------------------------|----------------------------|
| "Large Sensitive Dogs" <sup>16</sup> <sub>5</sub> | <i>Canis lupus familiaris</i>   | 23.1 ±0.7kg                | 66.1 ±0.7                  |
| Shetland Pony Gelding <sup>17</sup>               | <i>Equus ferus caballus</i>     | 250.9 ±11.3kg              | 69.8 ±.91                  |
| Pasture horses <sup>18</sup> <sub>6</sub>         | <i>Equus caballus</i>           | 500-800 kg                 | 81.3 ±2.28                 |
| Talas tuco-tuco <sup>19</sup>                     | <i>Ctenomys talarum</i>         | 130g                       | 42                         |
| Sprague Dawley rats <sup>20</sup>                 | <i>Rattus norvegicus</i>        | 160g                       | 59±5                       |
| Human                                             | <i>Homo sapiens</i>             | 20.6–22.2kg/m <sup>2</sup> | 65.0 ±8.1                  |
| Sheep <sup>21</sup>                               | <i>Ovis aries</i>               | 27 kg                      | 67.8                       |
| Sika Deer <sup>22</sup>                           | <i>Cervus nippon</i>            | 56 kg                      | 62.5                       |
| Broiler (immature) <sup>23</sup>                  | <i>Gallus gallus domesticus</i> |                            | 79                         |
| Hens <sup>23</sup>                                | <i>Gallus gallus domesticus</i> |                            | 72.                        |
| End of Table                                      |                                 |                            |                            |



**Table 3:** Collection of animal body mass(kg) and colon length values(m)

| <b>Animal</b>                | <b>Scientific Name</b>                      | <b>Colon Length(m)</b> | <b>Body Mass(kg)</b> |
|------------------------------|---------------------------------------------|------------------------|----------------------|
| Camel <sup>24</sup>          | <i>Camelus Dromedarius</i>                  | 17.07                  | 400                  |
| Horse <sup>24</sup>          | <i>Equus ferus caballus</i>                 | 6.40                   | 498.9516             |
| Elephant <sup>24</sup>       | <i>Loxodonta africana</i>                   | 6.25                   | 5443                 |
| Zebra <sup>24</sup>          | <i>Equus quagga</i>                         | 5.94                   | 360.00               |
| Horse <sup>24</sup>          | <i>Equus ferus caballus</i>                 | 6.47                   | 498.9516             |
| Donkey <sup>24</sup>         | <i>Equus asinus</i>                         | 4.85                   | 120                  |
| Mule <sup>24</sup>           | <i>Equus asinus x Equus caballus</i>        | 6.73                   | 498.9516             |
| Ox <sup>24</sup>             | <i>Bos taurus</i>                           | 10.18                  | 544                  |
| Camel <sup>24</sup>          | <i>Camelus Dromedarius</i>                  | 17.72                  | 400                  |
| Sheep and Goat <sup>24</sup> | <i>Ovis aries and Capra aegagrus hircus</i> | 6.17                   | 45.6                 |
| Hog <sup>24</sup>            | <i>Sus scrofa linnaeus</i>                  | 4.99                   | 50                   |
| Dog <sup>24</sup>            | <i>Canis lupus familiaris</i>               | 0.13                   | 30                   |
| Cat <sup>24</sup>            | <i>Felis catus</i>                          | 0.17                   | 5.44                 |
| Rabbit <sup>24</sup>         | <i>Oryctolagus cuniculus</i>                | 0.28                   | 2.95                 |
| lion <sup>25</sup>           | <i>Panthera Leo</i>                         | 1.40                   | 131.4                |
| Llama <sup>26</sup>          | <i>Lama glama</i>                           | 7.4                    | 140                  |
| rat <sup>27</sup>            | <i>Rattus rattus</i>                        | 0.06                   | 0.08                 |
| musk deer <sup>28</sup>      | <i>Moschus moschiferus</i>                  | 3.9624                 | 11.79                |
| Pony <sup>29</sup>           | <i>Equus ferus caballus</i>                 | 4.2                    | 325                  |
| Malayan Tapir <sup>29</sup>  | <i>Tapirus indicus</i>                      | 5.9                    | 160                  |
| Horse <sup>29</sup>          | <i>Equus ferus caballus</i>                 | 7                      | 800                  |
| Horse <sup>29</sup>          | <i>Equus ferus caballus</i>                 | 7.5                    | 800                  |
| Zebra <sup>29</sup>          | <i>Equus quagga</i>                         | 4.7                    | 1300                 |
| Black Rhino <sup>29</sup>    | <i>Diceros bicornis</i>                     | 4.9                    | 2100                 |
| Black Rhino <sup>29</sup>    | <i>Diceros bicornis</i>                     | 2.9                    | 2100                 |
| White Rhino <sup>29</sup>    | <i>Ceratotherium simum</i>                  | 7.2                    | 6500                 |
| Indian Rhino <sup>29</sup>   | <i>Rhinoceros unicornis</i>                 | 9.1                    | 4700                 |
| Indian Rhino <sup>29</sup>   | <i>Rhinoceros unicornis</i>                 | 6.4                    | 4700                 |
| Elephant <sup>29</sup>       | <i>loxodonta africana</i>                   | 8.5                    | 13000                |
| Elephant <sup>29</sup>       | <i>loxodonta africana</i>                   | 5.8                    | 13000                |
| Elephant <sup>29</sup>       | <i>loxodonta africana</i>                   | 6                      | 13000                |

**Table 4:** Power laws indicate 95 percent confidence intervals for the relationship to body mass and fecal geometries

|             | <b>Cylinder diameter</b> | <b>Pellet length</b> | <b>Pellet width</b> |
|-------------|--------------------------|----------------------|---------------------|
| Best fit    | $L = 0.52M^{0.17}$       | $L = 4.66M^{0.25}$   | $W = 0.85M^{0.35}$  |
| upper bound | $L = 0.58M^{0.20}$       | $L = 5.26M^{0.29}$   | $W = 0.99M^{0.41}$  |
| lower bound | $L = 0.47M^{0.13}$       | $L = 4.10M^{0.20}$   | $W = 0.72M^{0.30}$  |

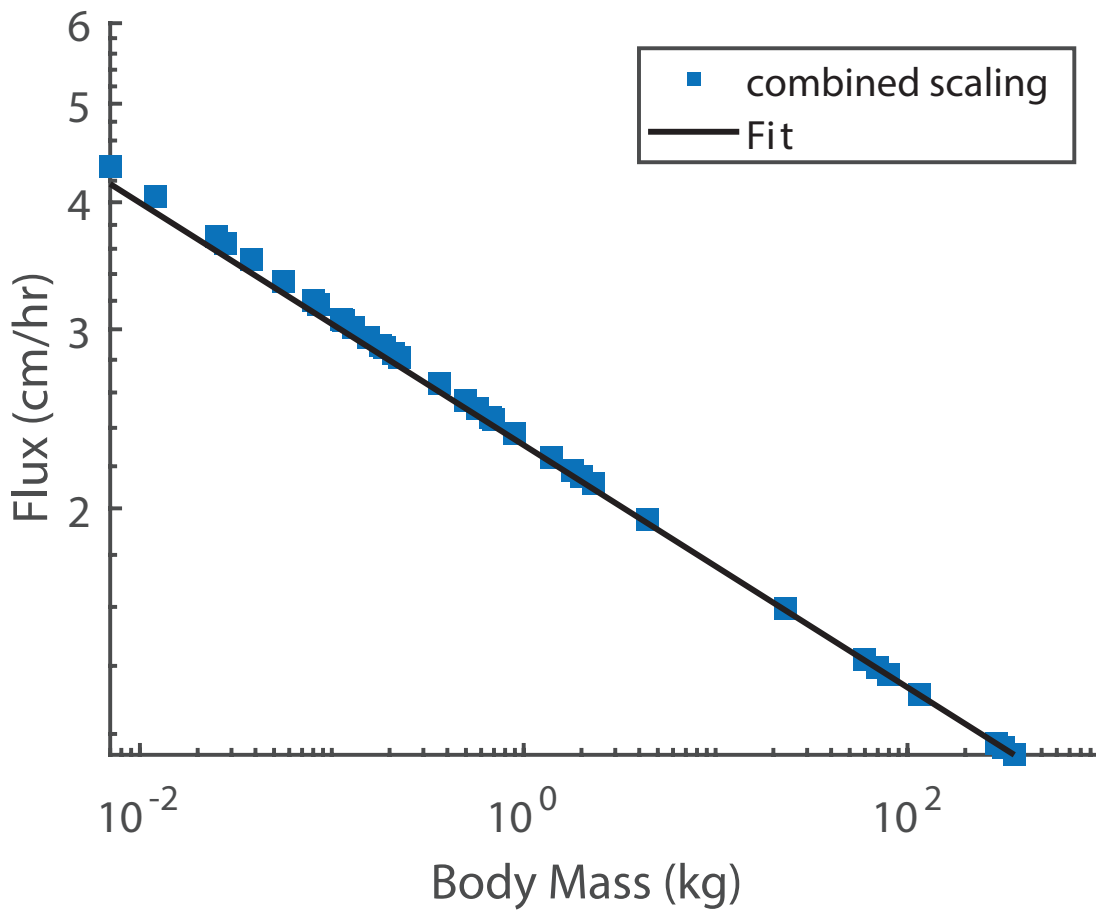

**Figure 3:** Plot detailing the summed scaling of the flux calculation from equation (11) in main text, which involves dry and wet mass intake, mass excretion, and dimensions of colon. The blue dots represent the calculated flux in cm/hr. The black line is the power law best fit,  $J \sim M^{-0.12}$



## 8 References

- 9 [1] Maulfair DD, Fustini M, Heinrichs AJ. Effect of varying total mixed ration particle size on  
10 rumen digesta and fecal particle size and digestibility in lactating dairy cows. *Journal of Dairy*  
11 *Science*. 2011 Jul;94(7):3527-36.
- 12 [2] Poncheki JK, Canha MLS, Viechnieski SL, Almeida Rd. Analysis of daily body weight of  
13 dairy cows in early lactation and associations with productive and reproductive performance.  
14 *Revista Brasileira de Zootecnia*. 2015 May;44(5):187-92. Available from: [http://www.scielo.  
15 br/scielo.php?script=sci\\_arttext&pid=S1516-35982015000500187&lng=en&tlng=en](http://www.scielo.br/scielo.php?script=sci_arttext&pid=S1516-35982015000500187&lng=en&tlng=en).
- 16 [3] Hummel J, Fritz J, Kienzle E, Medici EP, Lang S, Zimmermann W, et al. Differences in  
17 fecal particle size between free-ranging and captive individuals of two browser species. *Zoo*  
18 *Biology*. 2008;27(1):70-7. eprint: <https://onlinelibrary.wiley.com/doi/pdf/10.1002/zoo.20161>.  
19 Available from: <https://onlinelibrary.wiley.com/doi/abs/10.1002/zoo.20161>.
- 20 [4] Przewalski's horse; 2016. Available from: [https://nationalzoo.si.edu/animals/  
21 przewalskis-horse](https://nationalzoo.si.edu/animals/przewalskis-horse).
- 22 [5] Xu MM, Wang DH. Water deprivation up-regulates urine osmolality and renal aquaporin 2 in  
23 Mongolian gerbils (*Meriones unguiculatus*). *Comparative Biochemistry and Physiology Part*  
24 *A: Molecular & Integrative Physiology*. 2016 Apr;194:37-44. Available from: [http://www.  
25 sciencedirect.com/science/article/pii/S1095643316300034](http://www.sciencedirect.com/science/article/pii/S1095643316300034).
- 26 [6] Ostrowski S, Williams JB, Mésochina P, Sauerwein H. Physiological acclimation of a desert an-  
27 telope, Arabian oryx (*Oryx leucoryx*), to long-term food and water restriction. *Journal of Com-*  
28 *parative Physiology B*. 2006 Mar;176(3):191-201. Available from: [http://link.springer.  
29 com/10.1007/s00360-005-0040-0](http://link.springer.com/10.1007/s00360-005-0040-0).
- 30 [7] Abad C, Cheung-Lau G, Coute-Monvoisin AC, Waschek JA. Vasoactive intestinal peptide  
31 deficient mice exhibit reduced pathology in trinitrobenzene sulfonic acid-induced colitis. *Neu-*  
32 *roimmunomodulation*. 2015;22(3):203-12. Available from: [https://www.ncbi.nlm.nih.gov/  
33 pmc/articles/PMC4297532/](https://www.ncbi.nlm.nih.gov/pmc/articles/PMC4297532/).
- 34 [8] Pilosof S, Herrera M LG. Variability in urine concentration and fecal water content of bats  
35 in a tropical deciduous forest. *Journal of Mammalogy*. 2010 Jun;91(3):580-5. Available from:  
36 <https://academic.oup.com/jmammal/article/91/3/580/838484>.
- 37 [9] Pilosof S, M LH. Variability in urine concentration and fecal water content of bats in a tropical  
38 deciduous forest; 2010. .
- 39 [10] Abe M, Miyajima Y, Hara T, Wada Y, Funaba M, Iriki T. Factors Affecting Water Balance  
40 and Fecal Moisture Content in Suckling Calves Given Dry Feed. *Journal of Dairy Science*.  
41 1999 Sep;82(9):1960-7. Available from: [https://linkinghub.elsevier.com/retrieve/pii/  
42 S0022030299754329](https://linkinghub.elsevier.com/retrieve/pii/S0022030299754329).
- 43 [11] Tschudin A, Clauss M, Codron D, Liesegang A, Hatt JM. Water intake in domestic rabbits  
44 (*Oryctolagus cuniculus*) from open dishes and nipple drinkers under different water and feeding  
45 regimes. *Journal of Animal Physiology and Animal Nutrition*. 2011;95(4):499-511. Available  
46 from: <https://onlinelibrary.wiley.com/doi/abs/10.1111/j.1439-0396.2010.01077.x>.

- 47 [12] Freudenberger DO, Hume ID. Effects of water restriction on digestive function in two macropodid marsupials from divergent habitats and the feral goat. *Journal of Comparative Physiology B*. 1993 Jun;163(3):247-57. Available from: <https://doi.org/10.1007/BF00261672>.
- 48
- 49
- 50 [13] Silva MdLC, Speridião PdGL, Marciano R, Amâncio OMS, de Moraes TB, de Moraes MB. Effects of soy beverage and soy-based formula on growth, weight, and fecal moisture: experimental study in rats. *Jornal de Pediatria*. 2015 May;91(3):306-12. Available from: <https://linkinghub.elsevier.com/retrieve/pii/S0021755715000042>.
- 51
- 52
- 53
- 54 [14] Jeong D, Kim DH, Kang IB, Kim H, Song KY, Kim HS, et al. Modulation of gut microbiota and increase in fecal water content in mice induced by administration of *Lactobacillus kefiranofaciens* DN1. *Food & Function*. 2017;8(2):680-6. Available from: <https://pubs.rsc.org/en/content/articlelanding/2017/fo/c6fo01559j>.
- 55
- 56
- 57
- 58 [15] Zentek J, Kaufmann D, Pietrzak T. Digestibility and Effects on Fecal Quality of Mixed Diets with Various Hydrocolloid and Water Contents in Three Breeds of Dogs. *The Journal of Nutrition*. 2002 Jun;132(6):1679S-1681S. Available from: <https://academic.oup.com/jn/article/132/6/1679S/4687683>.
- 59
- 60
- 61
- 62 [16] Nery J, Biourge V, Tournier C, Leray V, Martin L, Dumon H, et al. Influence of dietary protein content and source on fecal quality, electrolyte concentrations, and osmolarity, and digestibility in dogs differing in body size. *Journal of Animal Science*. 2010 Jan;88(1):159-69. Available from: <https://academic.oup.com/jas/article/88/1/159/4740407>.
- 63
- 64
- 65
- 66 [17] Houpt K, Perry P. Effect of Chronic Furosemide on Salt and Water Intake of Ponies. *Journal of Equine Veterinary Science*. 2016 Dec;47:31-5. Available from: <https://linkinghub.elsevier.com/retrieve/pii/S0737080616301174>.
- 67
- 68
- 69 [18] Williams S, Horner J, Orton E, Green M, McMullen S, Mobasher A, et al. Water intake, faecal output and intestinal motility in horses moved from pasture to a stabled management regime with controlled exercise. *Equine Veterinary Journal*. 2015;47(1):96-100. Available from: <https://beva.onlinelibrary.wiley.com/doi/abs/10.1111/evj.12238>.
- 70
- 71
- 72
- 73 [19] Baldo MB, Antenucci CD. Diet effect on osmoregulation in the subterranean rodent *Ctenomys talarum*. *Comparative Biochemistry and Physiology Part A: Molecular & Integrative Physiology*. 2019 Sep;235:148-58. Available from: <http://www.sciencedirect.com/science/article/pii/S1095643318303891>.
- 74
- 75
- 76
- 77 [20] Lee DK, Jang S, Baek EH, Kim MJ, Lee KS, Shin HS, et al. Lactic acid bacteria affect serum cholesterol levels, harmful fecal enzyme activity, and fecal water content. *Lipids in Health and Disease*. 2009 Jun;8(1):21. Available from: <https://doi.org/10.1186/1476-511X-8-21>.
- 78
- 79
- 80 [21] Kolar L, Flajs VC, Kužner J, Marc I, Pogačnik M, Bidovec A, et al. Time profile of abamectin and doramectin excretion and degradation in sheep faeces. *Environmental Pollution*. 2006 Nov;144(1):197-202. Available from: <http://www.sciencedirect.com/science/article/pii/S0269749106000145>.
- 81
- 82
- 83
- 84 [22] Horino SI, Nomiya H. Defecation of sika deer, *Cervus nippon*. *Mammal Study*. 2008;33:143-50. Available from: [https://www.jstage.jst.go.jp/article/mammalstudy/33/4/33\\_4\\_143/\\_pdf](https://www.jstage.jst.go.jp/article/mammalstudy/33/4/33_4_143/_pdf).
- 85
- 86

- 87 [23] Ogunji PA, Brewer RN, Roland DA, Caldwell D. Effect of dietary sodium chloride, protein,  
88 and strain difference upon water consumption and fecal moisture content of broiler breeder  
89 males. *Poultry Science*. 1983 Dec;62(12):2497-500.
- 90 [24] Carus CG. *An Introduction to the Comparative Anatomy of Animals: Comp. with Constant*  
91 *Reference to Physiology, and Elucidated by Twenty Copper-plates*. Longman, Rees, Orme,  
92 Brown, and Green; 1827.
- 93 [25] Davis DD. Allometric Relationships in Lions Vs. Domestic Cats. *Evolution*. 1962;16(4):505-  
94 14. Available from: [https://onlinelibrary.wiley.com/doi/abs/10.1111/j.1558-5646.](https://onlinelibrary.wiley.com/doi/abs/10.1111/j.1558-5646.1962.tb03240.x)  
95 [1962.tb03240.x](https://onlinelibrary.wiley.com/doi/abs/10.1111/j.1558-5646.1962.tb03240.x).
- 96 [26] Fowler M. *Medicine and Surgery of Camelids*. John Wiley & Sons; 2011.
- 97 [27] Miller DL. Rat small intestine: Development, composition and effects of perfusion. *The*  
98 *American Journal of Digestive Diseases*. 1971 Mar;16(3):247-54. Available from: [https://](https://doi.org/10.1007/BF02235247)  
99 [doi.org/10.1007/BF02235247](https://doi.org/10.1007/BF02235247).
- 100 [28] Flower WH. On the Structure and Affinities of the Musk-Deer (*Moschus moschiferus*, Linn.).  
101 *The Proceedings of the Scientific Meetings of the Zoological Society of London*. 1875:159-90.
- 102 [29] Clauss M, Frey R, Kiefer B, Lechner-Doll M, Loehlein W, Polster C, et al. The maximum  
103 attainable body size of herbivorous mammals: morphophysiological constraints on foregut,  
104 and adaptations of hindgut fermenters. *Oecologia*. 2003 Jun;136(1):14-27.
